# Supplementary material for: Exfoliating layered zeolite MFI into unilamellar nanosheets in solution as precursors for the synthesis of hierarchical nanocomposites and oriented films
Source: Royal Society of Chemistry journal article supplement (doi:10.1039/d2qi02283d), 2023-01-01
Supplement: d2qi02283d1.pdf [file d2qi02283d1.pdf]

Supporting Information

## Exfoliating layered zeolite MFI into unilamellar nanosheets in solution as precursors for the synthesis of hierarchical nanocomposites and oriented films

Wieslaw J. Roth,<sup>\*a</sup> Takayoshi Sasaki,<sup>\*c</sup> Karol Wolski,<sup>a</sup> Barbara Gil,<sup>a</sup> Szczepan Zapotoczny,<sup>a</sup> Jiri Cejka,<sup>b</sup> Martin Kubu,<sup>b</sup> Michal Mazur,<sup>b</sup> Yasuo Ebina,<sup>c</sup> Nobuyuki Sakai,<sup>c</sup> Dai-Ming Tang,<sup>c</sup> and Renzhi Ma<sup>c</sup>

<sup>a</sup>Jagiellonian University, Faculty of Chemistry, Gronostajowa 2, 30-387 Kraków, Poland

<sup>b</sup>Department of Physical and Macromolecular Chemistry, Faculty of Science, Charles University, Hlavova 8, 12840 Prague 2, Czech Republic

<sup>c</sup>International Centre for Materials Nanoarchitectonics (WPI-MANA), National Institute for Materials Science (NIMS), 1-1 Namiki, Tsukuba, Ibaraki 305-0044, Japan.

\*corresponding authors

Email: [wieslaw.roth@uj.edu.pl](mailto:wieslaw.roth@uj.edu.pl), [sasaki.takayoshi@nims.go.jp](mailto:sasaki.takayoshi@nims.go.jp)

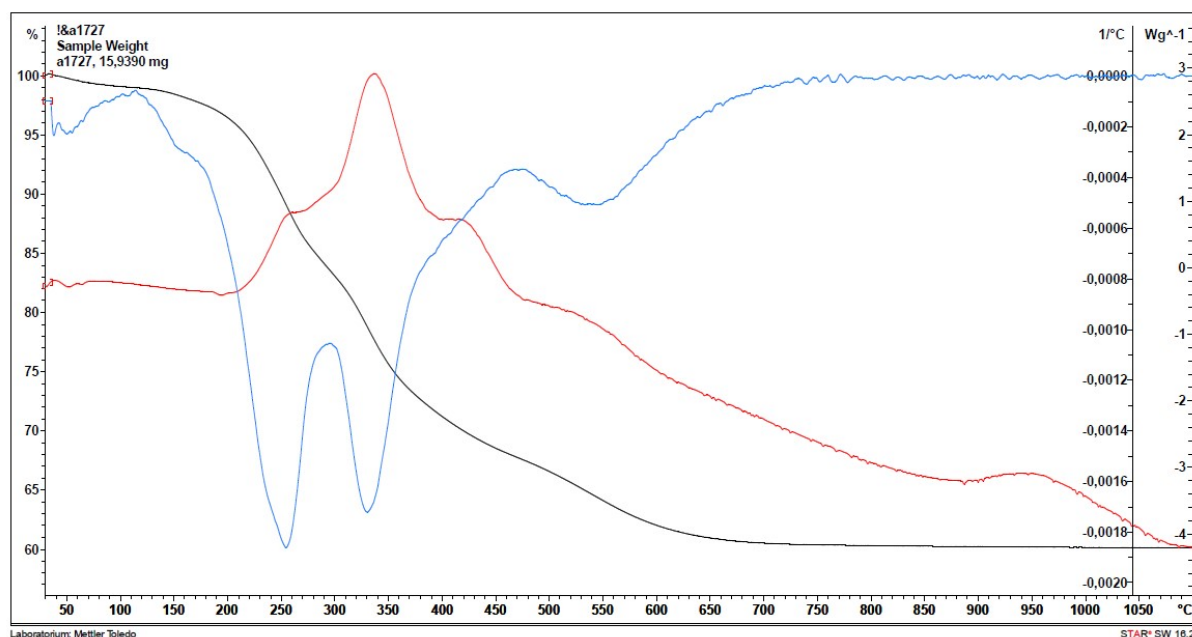

Figure S1. TG-DTA plots for an as-synthesized lamellar MFI: TG (thermal gravimetry, black), DTG (differential scanning gravimetry, blue, right scale, 1/C) and DSC (differential scanning calorimetry red, right scale, Wg<sup>-1</sup>).

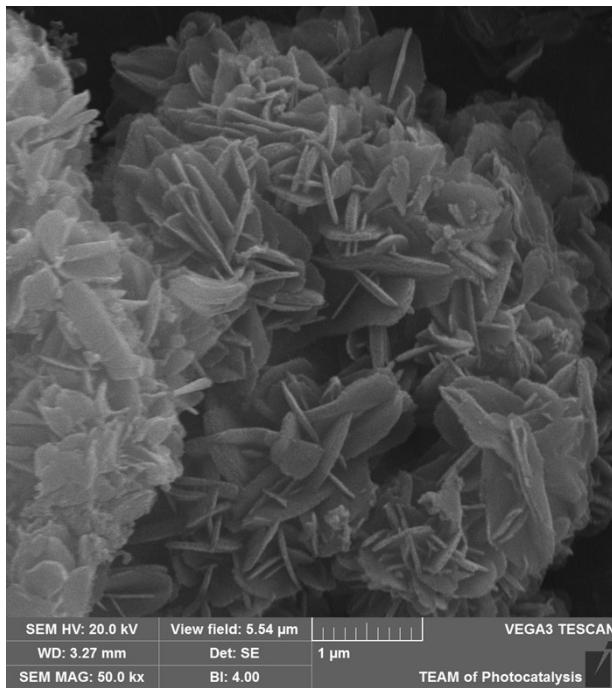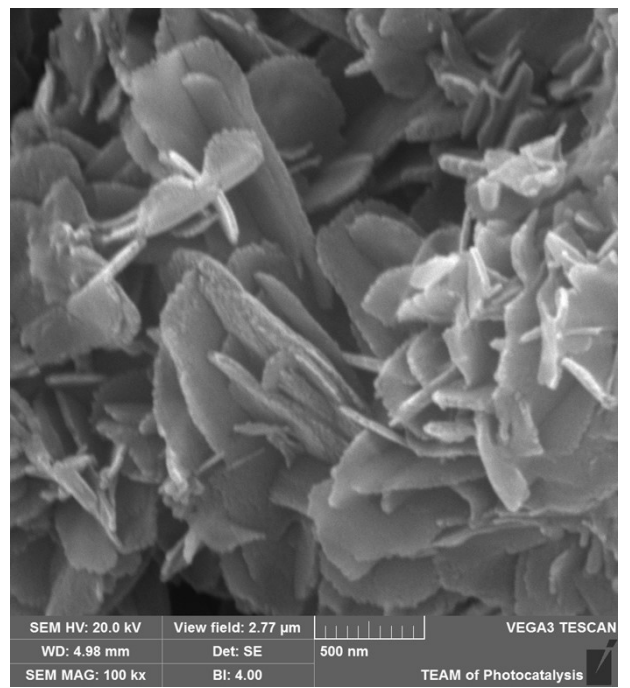

Figure S2. SEM of as-synthesized lamellar MFI
